# Supplementary material
Source: Springer Nature journal article supplement (https://www.springermedizin.de/resource/supplementary/12936_2011_1946_MOESM20_ESM.pdf/9542110)
Supplement: MOESM20 [file 9542110]

# DUO-COTECXIN®

Dihydroartémisinine / Pipéraquline phosphate

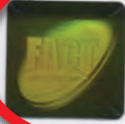

Adultes  
Enfants  
plus de 6 ans

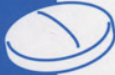

8 comprimés  
sécables

 华立科泰  
HOLLEY-COTEC

**DUO-COTECXIN®**  
Manufactured by Zhejiang Holley Nanhu Pharmaceutical Co., Ltd.  
205, Yunhai Road, Economy Development Zone, Jiaying City, P.R. China  
Under license of Holleypharm

MFD : 09082006  
EXP : 06/2008  
LOT : 040806

 华立科泰  
HOLLEY-COTEC

Adults  
Children  
over 6 years old

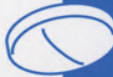

8 scored tablets

**DUO-COTECXIN®**  
Dihydroartémisinine / Pipéraquline phosphate

Indications :  
Prescription only.  
Read carefully insert notice.  
Keep out of the reach of children.

Indications :  
Sur ordonnance uniquement.  
Lire attentivement la notice.  
Garder hors de portée des enfants.

DUO-COTECXIN® voie orale  
Composition par comprimé :  
Dihydroartémisinine.....40 mg  
Pipéraquline phosphate.....320 mg

DUO-COTECXIN® oral route  
Composition per tablet :  
Dihydroartémisinine.....40 mg  
Pipéraquline phosphate.....320 mg
